# Supplementary material for: Genomic characterization of two Staphylococcus epidermidis bacteriophages with anti-biofilm potential
Source: PubMed Central journal article supplement (PMC3505474; doi:10.1186/1471-2164-13-228), 2012-06-08

**Figure S1**

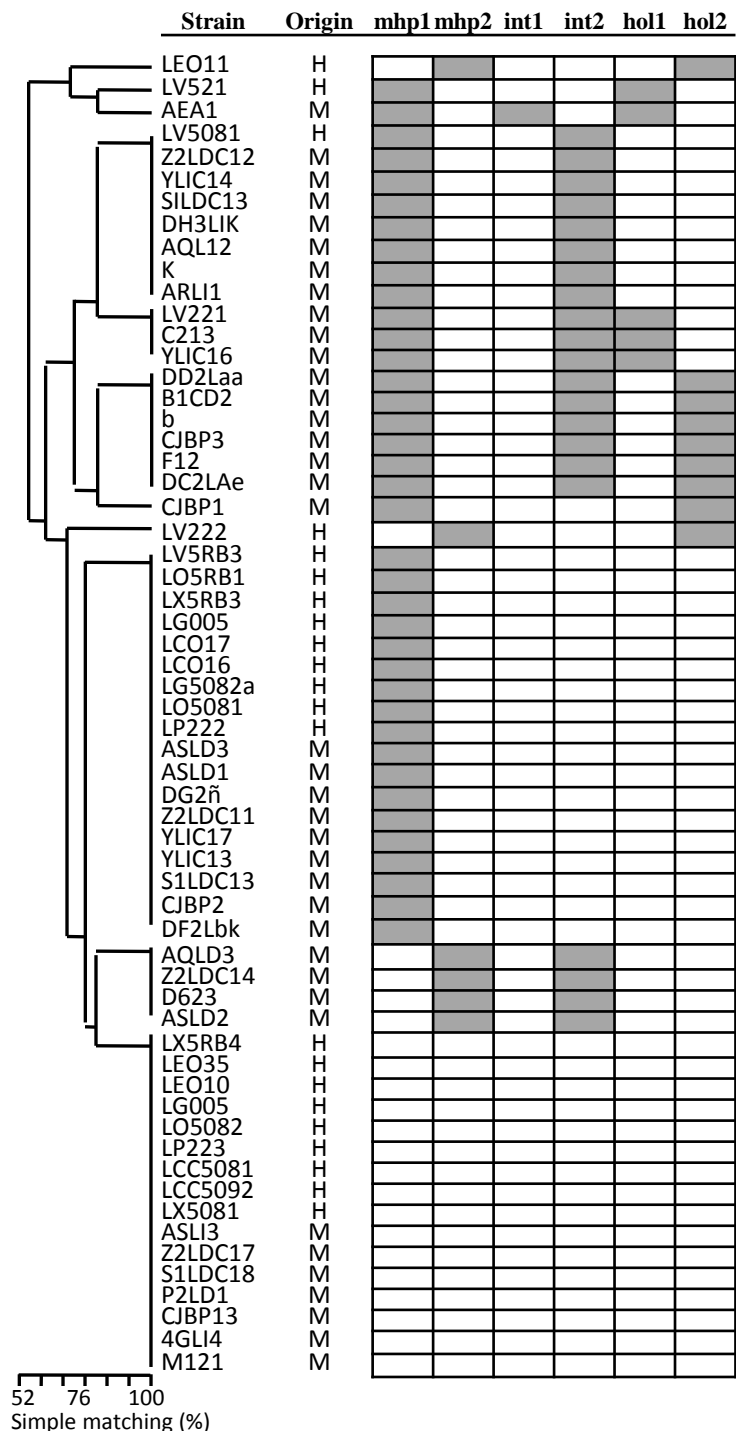

Supplement: 1471-2164-13-228-S5.pdf [file 1471-2164-13-228-S5.pdf]
